# Supplementary material for: An implantable ionic therapeutic platform for photodynamic therapy with wireless capacitive power transfer
Source: Royal Society of Chemistry journal article supplement (doi:10.1039/d2mh01548j), 2023-01-01
Supplement: d2mh01548j1.pdf [file d2mh01548j1.pdf]

## Supporting Information

### An Implantable Ionic Therapeutic Platform for Photodynamic Therapy with Wireless Capacitive Power Transfer

Seol-Ha Jeong<sup>a,b,†</sup>, Min-Gyu Lee<sup>a,†</sup>, Chong-Chan Kim<sup>a</sup>, Jeehun Park<sup>a,b</sup>, Yujin Baek<sup>a,b</sup>, **Byung Ik Park<sup>a</sup>**, Junsang Doh<sup>a,b</sup>, Jeong-Yun Sun<sup>a,b,\*</sup>

<sup>a</sup> Department of Materials Science and Engineering, Seoul National University, Seoul, South Korea

<sup>b</sup> Research Institute of Advanced Materials (RIAM), Seoul National University, Seoul, South Korea

†These authors contributed equally to this work.

\* To whom correspondence should be addressed. E-mail: jysun@snu.ac.kr

Keywords: Photodynamic Therapy, Anti-tumor therapy, Implantable therapeutic platform, Wireless power transfer, Ionic device

#### This file includes:

**Fig. S1.** Schematic diagram of fabrication of i-WLDD.

**Fig. S2.** Absorption peaks of Ce6 spectrum and optical emission spectrum of i-WLDD and laser with the wavelength of 660 nm for Direct Light group.

**Fig.S3.** Mechanical properties of i-WLDD.

**Fig.S4.** *In vitro* cell attachment on i-WLDD using HDF.

**Fig.S5.** *In vitro* invasion observation of 4T1 spheroids with the size of 400 um as function of time.

**Fig. S6.** Micro-CT images of *in vivo* implantation of i-WLDD in subcutaneous site of Balb/c mice.

**Fig. S7.** **Stability of i-WLDD after implantation *in vivo*.**

**Fig. S8.** **Temperature change of i-WLDD during its operation.**

**Fig. S9.** *In vivo* observation of B16F10 tumor tissue after treatment.

**Fig. S10.** *In vivo* observation of 4T1 tumor tissue after ES at Day 14.

**Fig. S11.** *In vivo* cytotoxicity of i-WLDD implantation by H&E staining analysis.

**Fig. S12.** **Body weight change of BALB/c mice graph over time.**

#### Other Supplementary Materials for this manuscript include the following:

**Movie S1 (mp4 format).** Light emitting operation of i-WLDD in living mouse.

**Movie S2 (mp4 format).** Light emission of i-WLDD according to frequency change of external voltage.

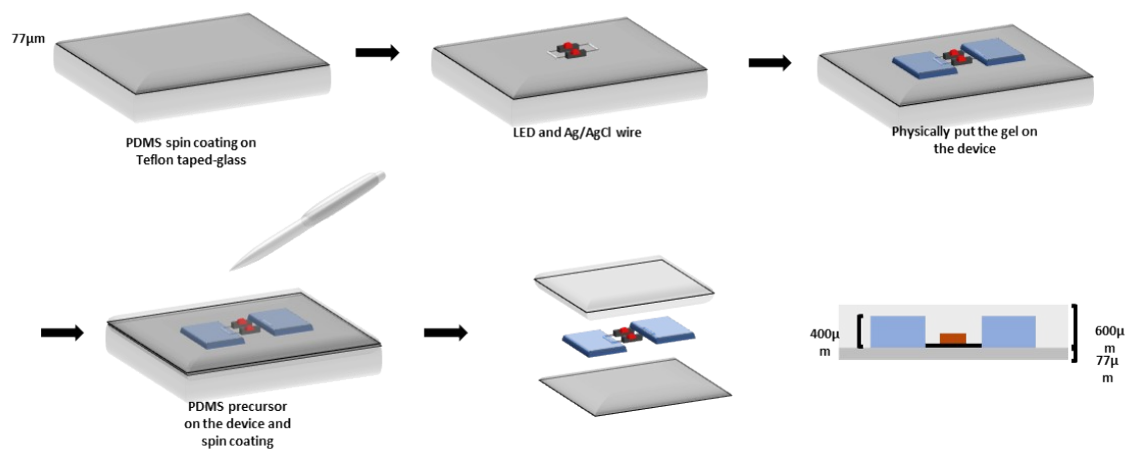

**Figure S1. Schematic diagram of fabrication of i-WLDD**

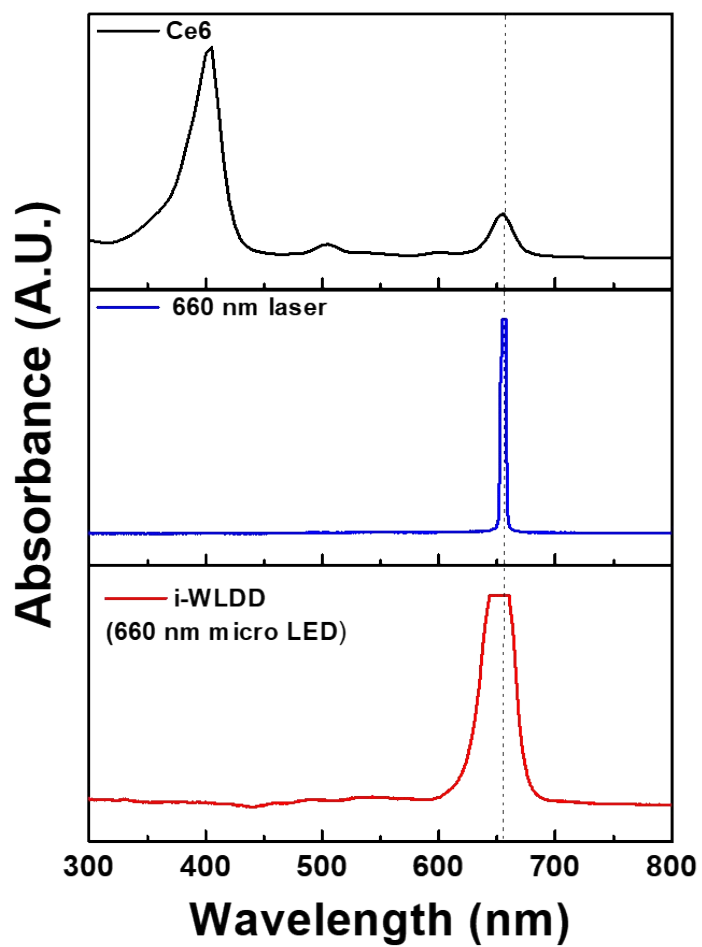

Figure S2. Absorption peaks of Ce6 spectrum and optical emission spectrum of i-WLDD and laser with the wavelength of 660 nm for Direct Light group

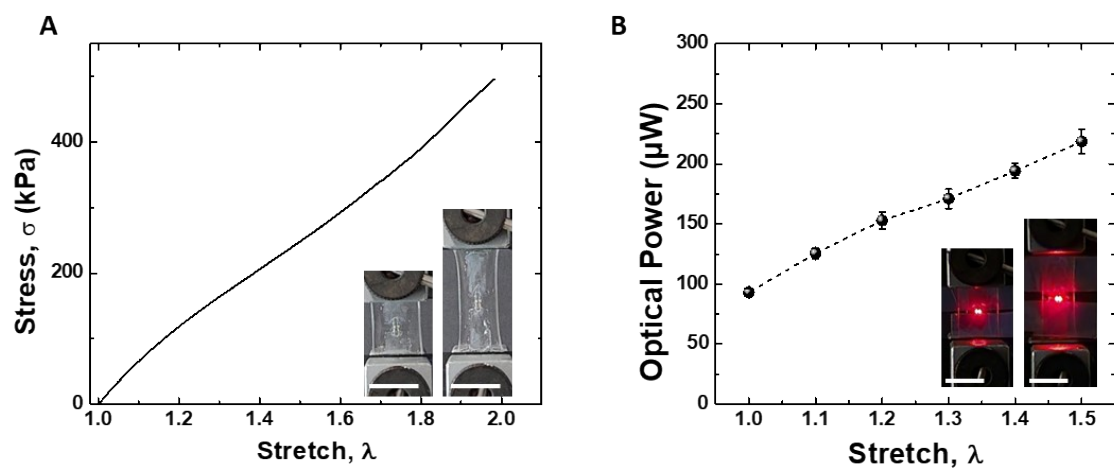

**Figure S3. Mechanical properties of i-WLDD. (A) Stress Strain graph at 0.5 min<sup>-1</sup>. (B) Optical power change under uniaxial strain up to 150%.**

**On Culture Plate**

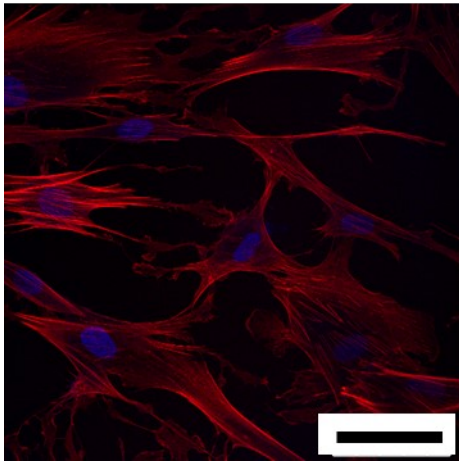

**On i-WLDD**

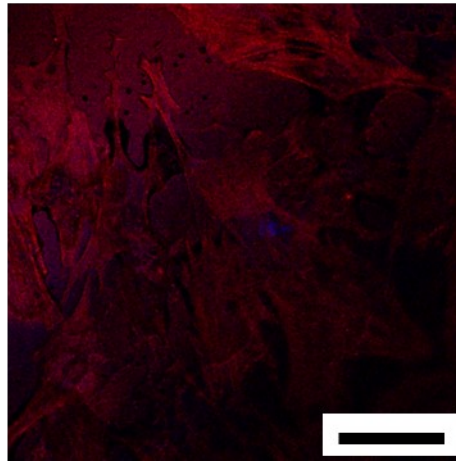

**Figure S4. *In vitro* cell attachment on i-WLDD using HDF: Confocal images after culturing HDF for 1 day on culture plate, and on i-WLDD (scale bar 75  $\mu$ m)**

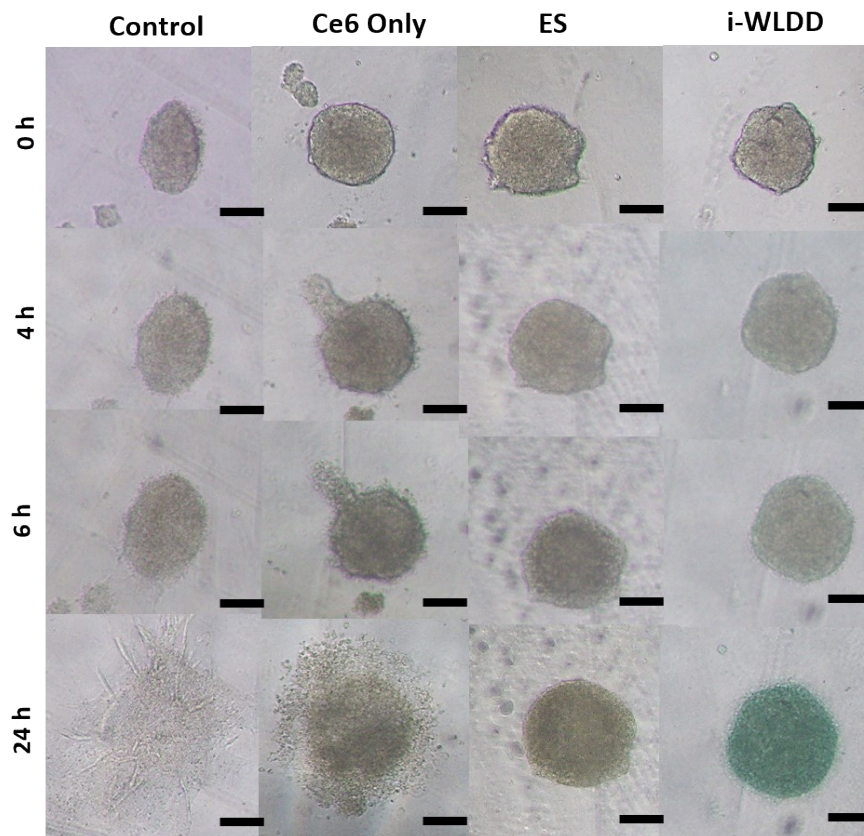

Figure S5. *In vitro* invasion observation of 4T1 spheroids with the size of 400  $\mu\text{m}$  as function of time. After 24 hr of culturing after various treatments (control group (untreated), Ce6 Only (only Ce6 injected), ES (Electrical Stimulation only), and i-WLDD group) for 30 min.

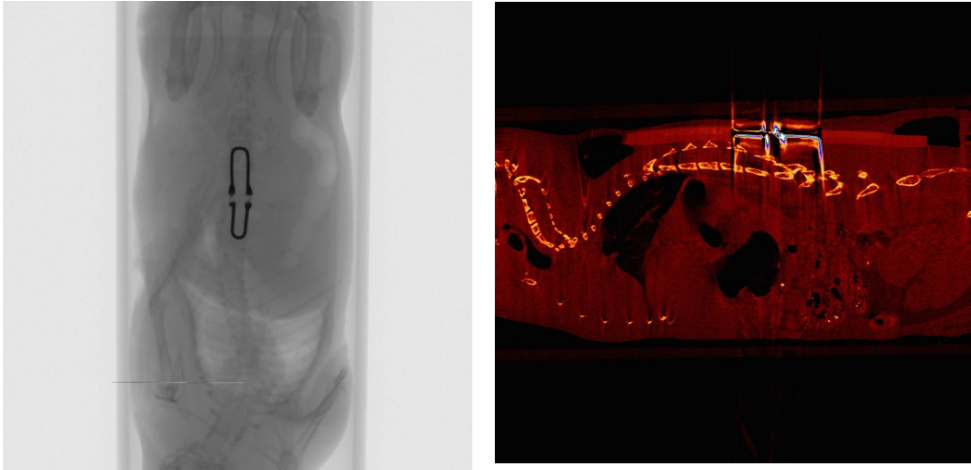

**Figure S6. Micro-CT images of *in vivo* implantation of i-WLDD in subcutaneous site of BALB/c mice**

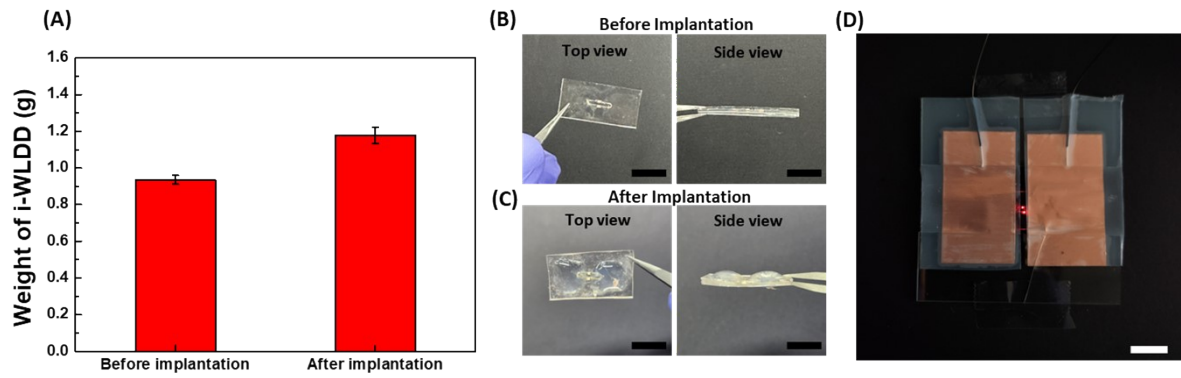

**Figure S7. Stability of i-WLDD after implantation *in vivo*: (A) Weight of i-WLDD compared with before and after implantation. (B) Photo of i-WLDD before implantation and (C) photo of i-WLDD after implantation. (D) i-WLDD operation after implantation and *in vivo* PDT treatment**



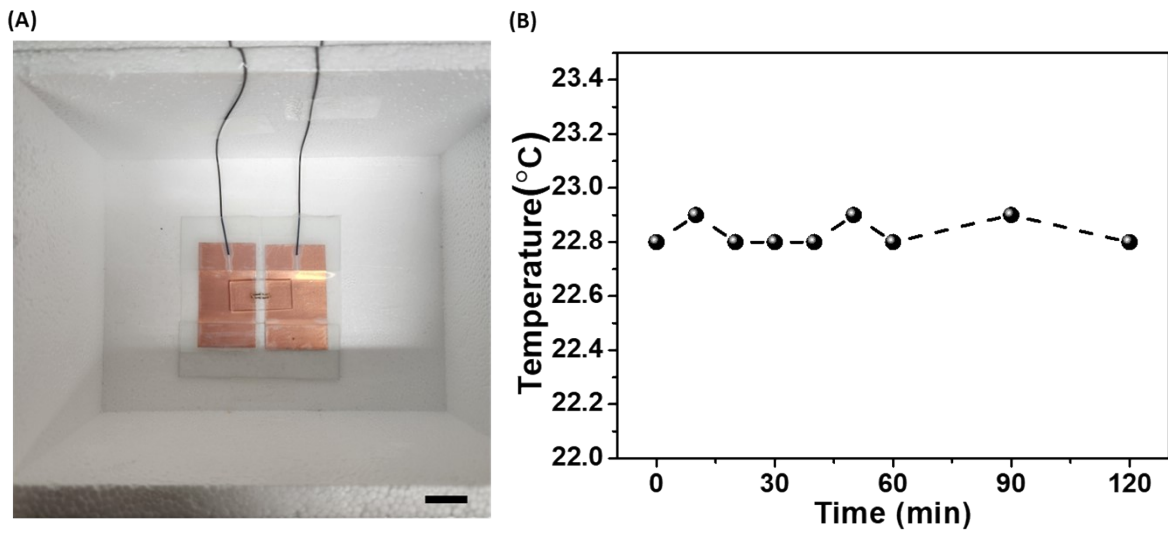

**Figure S8. Temperature change of i-WLDD while its operation: (A) Setup for temperature measurement of i-WLDD in the insulated box (scale bar: 2 cm). (B) Temperature graph over 2 hours of i-WLDD operation.**

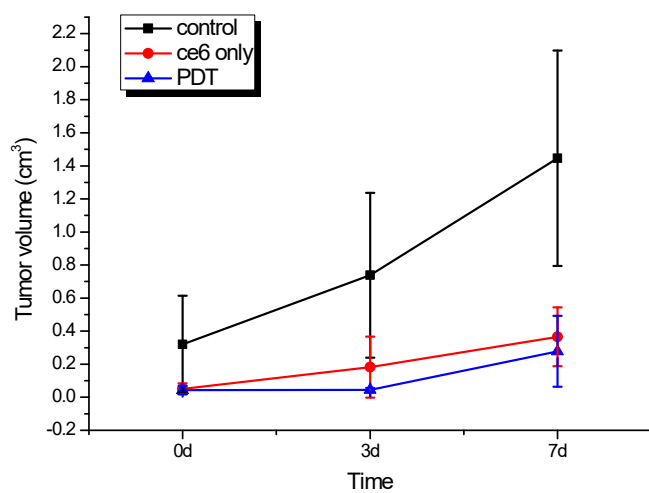

**Figure S9.** *In vivo* observation of B16F10 tumor tissue after treated by PDT through i-WLDD up to D7 with comparison with control, and ce6 only groups.

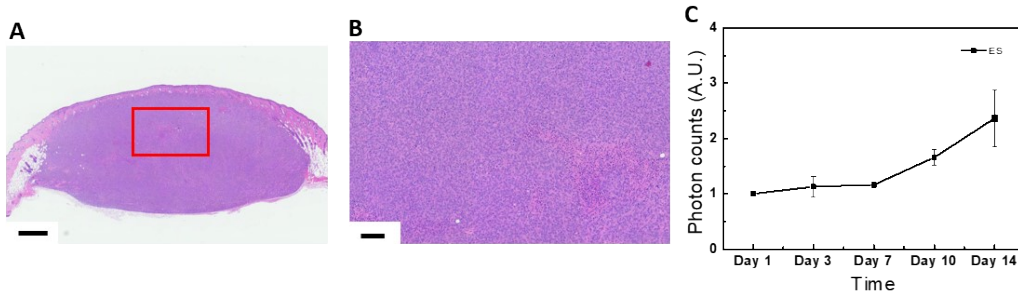

**Figure S10.** *In vivo* observation of 4T1 tumor tissue after ES at Day 14. (A) H&E image of 4T1 tumor tissue after ES (scale bar 600  $\mu\text{m}$ ) and (B) that of high magnification (scale bar 100  $\mu\text{m}$ ) (C) photon count graph after ES by bioluminescence imaging

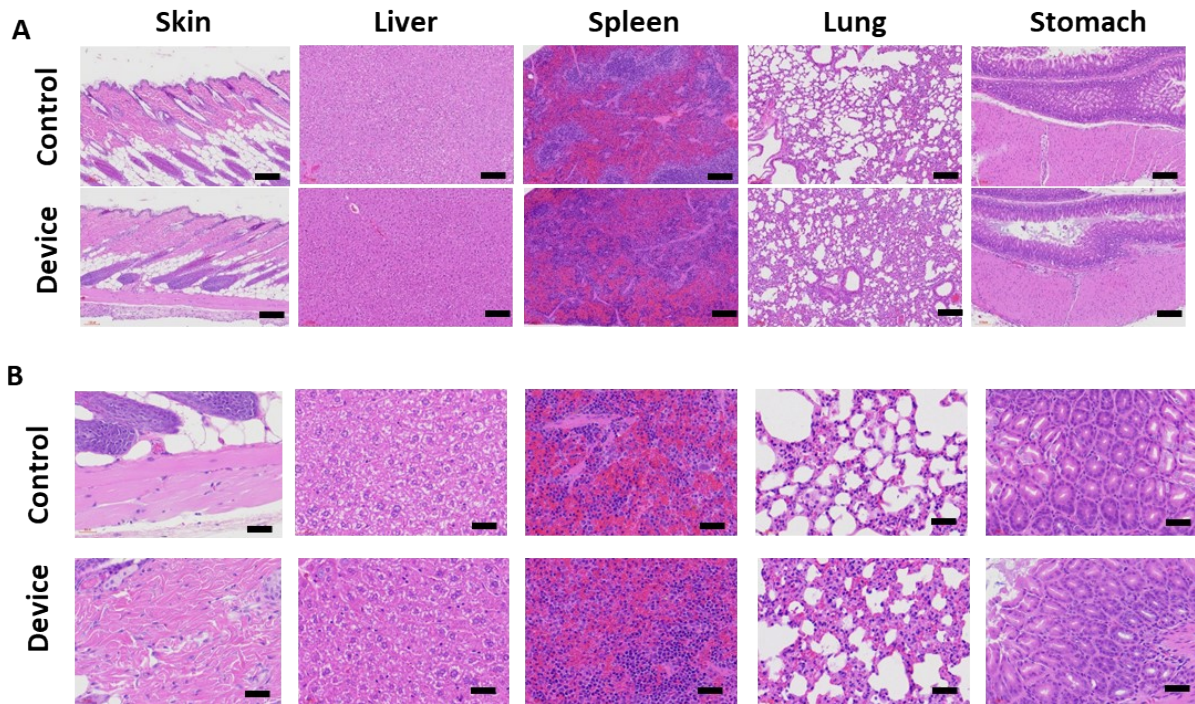

**Figure S11.** *In vivo* cytotoxicity of i-WLDD implantation by H&E staining analysis of skin, liver, spleen, lung, and stomach after 7 days of i-WLDD implantation in subcutaneous site of BALB/C mice (A) x4 images (scale bar = 500  $\mu$ m) and (B) x40 images (scale bar = 50  $\mu$ m)

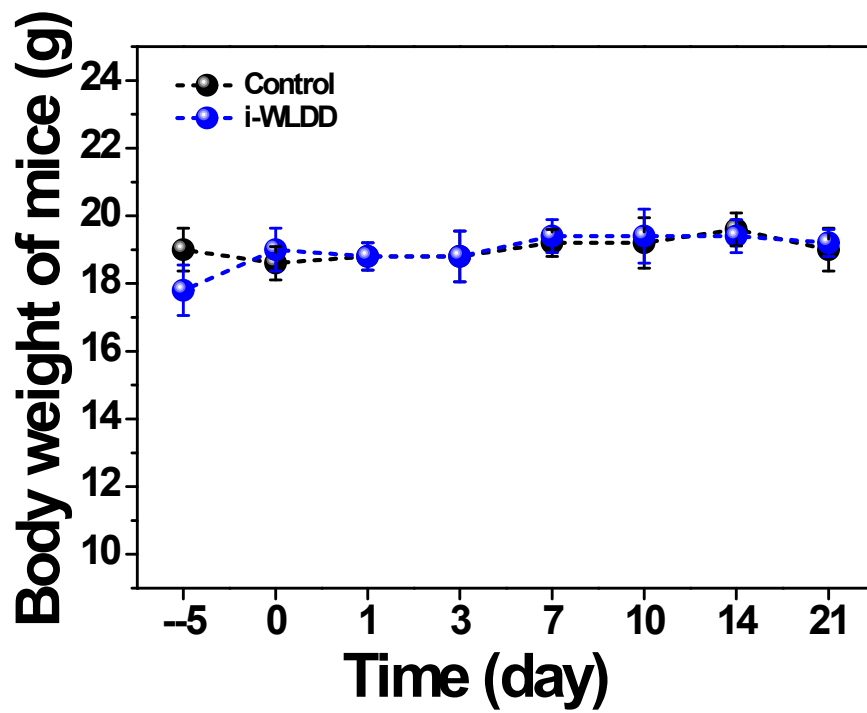

**Figure S12. Body weight change of BALB/c mice graph over time: Comparison of body weights between control group and i-WLDD group. PDT was performed 5 days after tumor inoculation, and body weights were measured up to 21 days.**
